# Supplementary material
Source: PubMed Central journal article supplement (PMC6481319)
Supplement: NIHMS1521269-supplement-1.pdf [file NIHMS1521269-supplement-1.pdf]

Kidney International

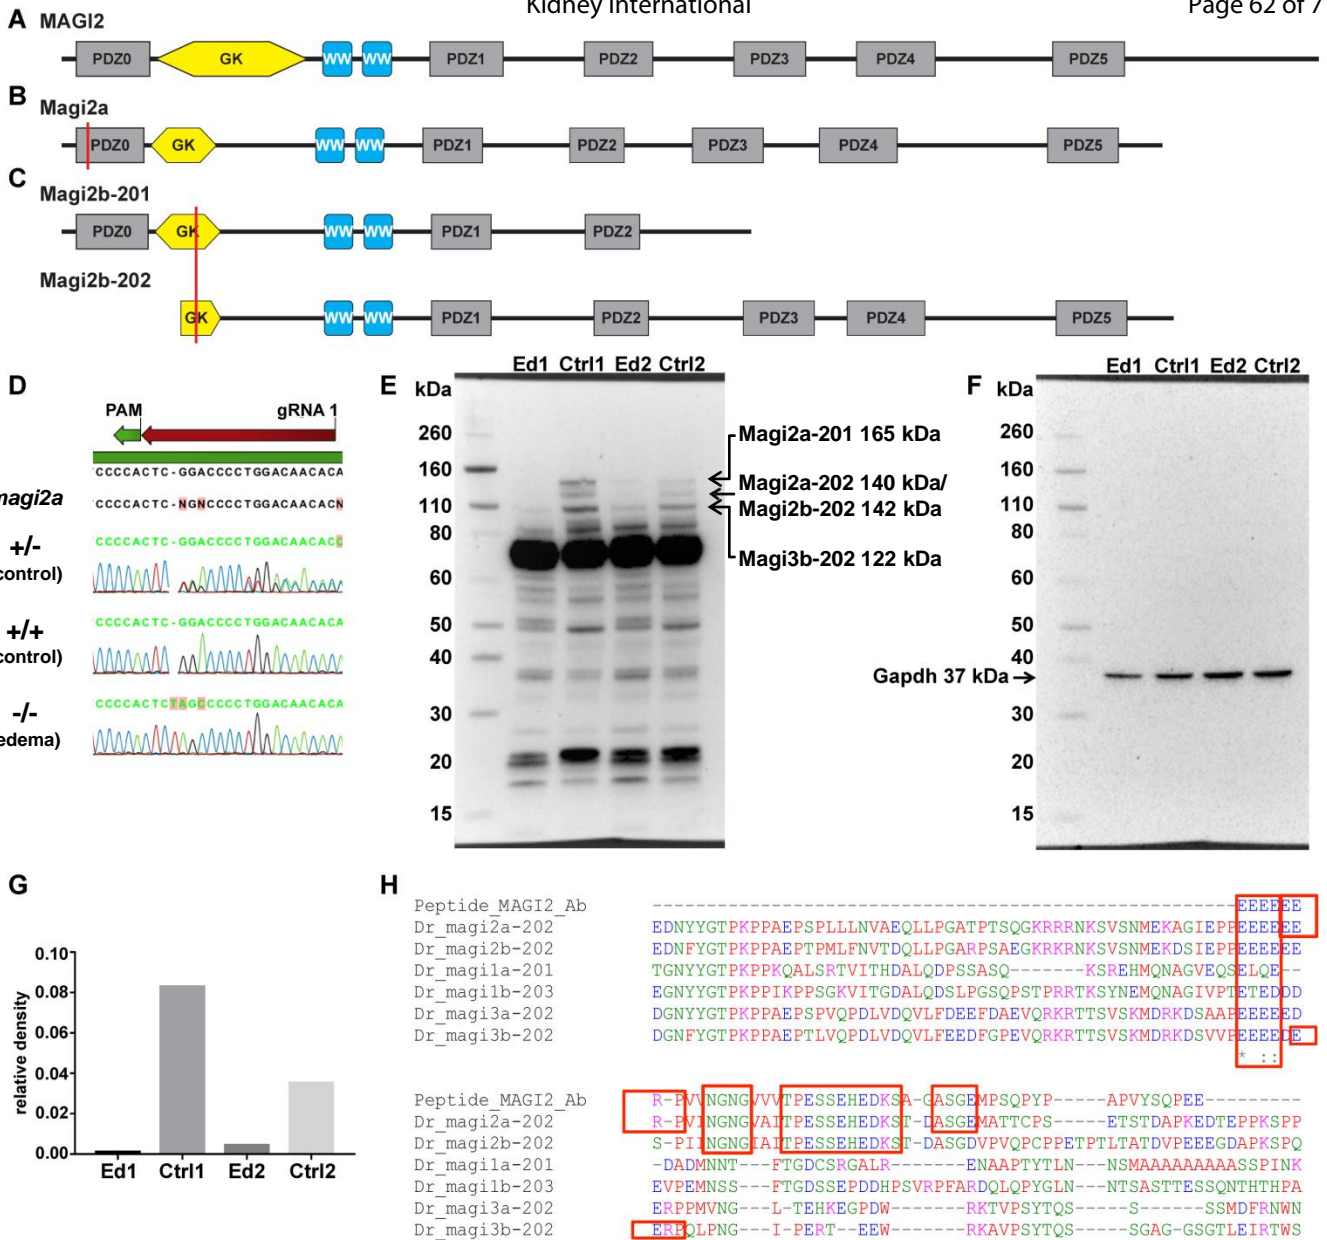

**Supplemental Figure S1. Zebrafish orthologues of human MAGI2.**

(A) The human MAGI2 protein features six PDZ domains (grey), one Guanylate Kinase-like (GK, yellow) domain and two WW domains (blue).

(B-C) Predicted domain structure of zebrafish Magi2a and Magi2b. More evidence exists that *magi2a* is the functional orthologue of human *MAGI2*. However, *magi2b* remains a potential orthologue. The red bar indicates the CRISPR target translated to the protein structure.

(B) Zebrafish Magi2a features the same domain structure as human MAGI2.

(C) For zebrafish *magi2b*, two incomplete putative transcripts are annotated where *magi2b-201* would represent a C-terminally truncated protein and *magi2b-202* an N-terminally truncated protein. Therefore, *magi2b* was targeted by CRISPR in the earliest overlapping region of both potential transcripts (red intersecting line).

(D) Sanger sequencing confirms homozygosity for *magi2a* (*c.69\_71delinsGCTA*, p.Pro24Leufs\*76) KO larvae with an edema phenotype (see **Fig. 3**). Data shown represent the genotypes observed in both control (*magi2a<sup>-/+</sup>* and *magi2a<sup>+/+</sup>*) and edema (*magi2a<sup>-/-</sup>*) cohorts.

(E) Immunoblot for Magi2a on protein lysates from pooled zebrafish larvae from the truncating allele *magi2a* (*c.69\_71delinsGCTA*, p.Pro24Leufs\*76) at 6 dpf. Larvae were sorted by phenotype, tail clipped for individual genotyping, but pooled for protein extraction. Edema samples (Ed1, Ed2) consisted of only *magi2a<sup>-/-</sup>* larvae, control samples (Ctrl1, Ctrl2) of a mix of *magi2a<sup>-/+</sup>* and *magi2a<sup>+/+</sup>*. For *magi2a* two transcripts exist, resulting in predicted proteins of 140 kDa (UniProt/ID: Q5VSD9) and 165 kDa (UniProt-ID: F1Q897) which could explain the disappearance of the upper double band in the KO larvae. Cross-reactivity of the used antibody with epitopes of the paralogues proteins Magi2b (UniProt-ID: A0A2R8QA68; 142 kDa) or Mag3b, as mapped in **H**, may explain residual or additional bands of >100 kDa.

(F) Immunoblot for Gapdh as loading control for **E**. No stripping was performed between **E** and **F**.

(G) Densitometry for **E/F**. The relative density of Magi2a-202 140 kDa bands normalized by the corresponding Gapdh bands is displayed.

(H) Clustal analysis of predicted proteins of zebrafish *magi1a/b*, *magi2a/b* and *magi3a/b* transcript variants, aligned to the human MAGI2 peptide that was used for the generation of antibody ARP61404\_P050 (Aviva Systems Biology, San Diego, CA). Red rectangles indicate potential cross-reacting epitopes (i.e., 4 consecutive amino acids) of Magi2b or the paralogues Magi1a, Magi1b, Magi3a and Magi3b.
