# Supplementary material
Source: PubMed Central journal article supplement (PMC6481319)
Supplement: NIHMS1521269-supplement-3.pdf [file NIHMS1521269-supplement-3.pdf]

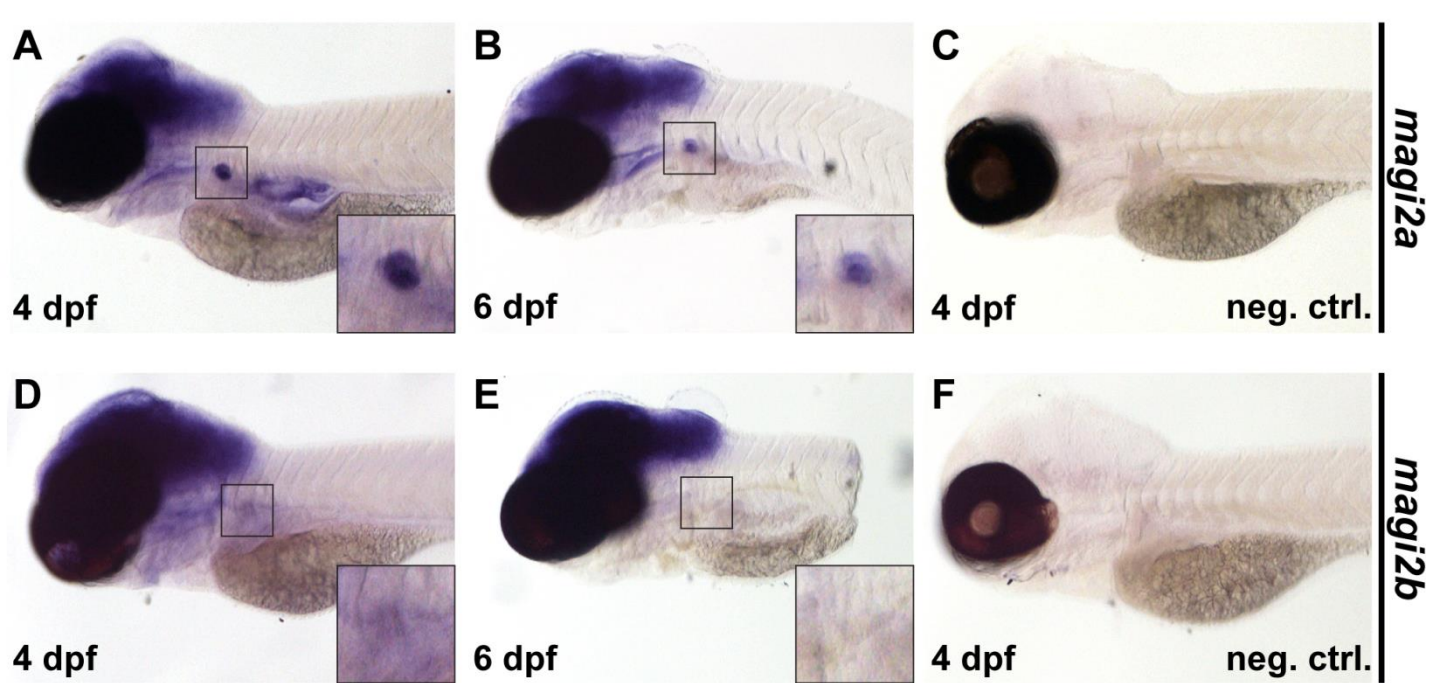

**Supplemental Figure S3. Whole Mount *in situ* hybridization for *magi2a* and *magi2b*.**

(A-C) Whole mount *in situ* hybridization for *magi2a* at 4 dpf (A) and 6 dpf (B) revealed expression in brain and pronephric glomerulus as highlighted in the magnified areas. No staining was observed in the negative control with sense probe at 4 dpf (C). A comparable result was obtained for negative control at 6 dpf (not shown).

(D-F) Whole mount *in situ* hybridization for *magi2b* at 4 dpf (D) and 6 dpf (E) revealed expression in the brain, but not in the pronephric glomerulus as highlighted in the magnified areas. No staining was observed in the negative control with sense probe at 4 dpf (F). A comparable result was obtained for negative control at 6 dpf (not shown).
