# Supplementary material
Source: PubMed Central journal article supplement (PMC6481319)
Supplement: NIHMS1521269-supplement-4.pdf [file NIHMS1521269-supplement-4.pdf]

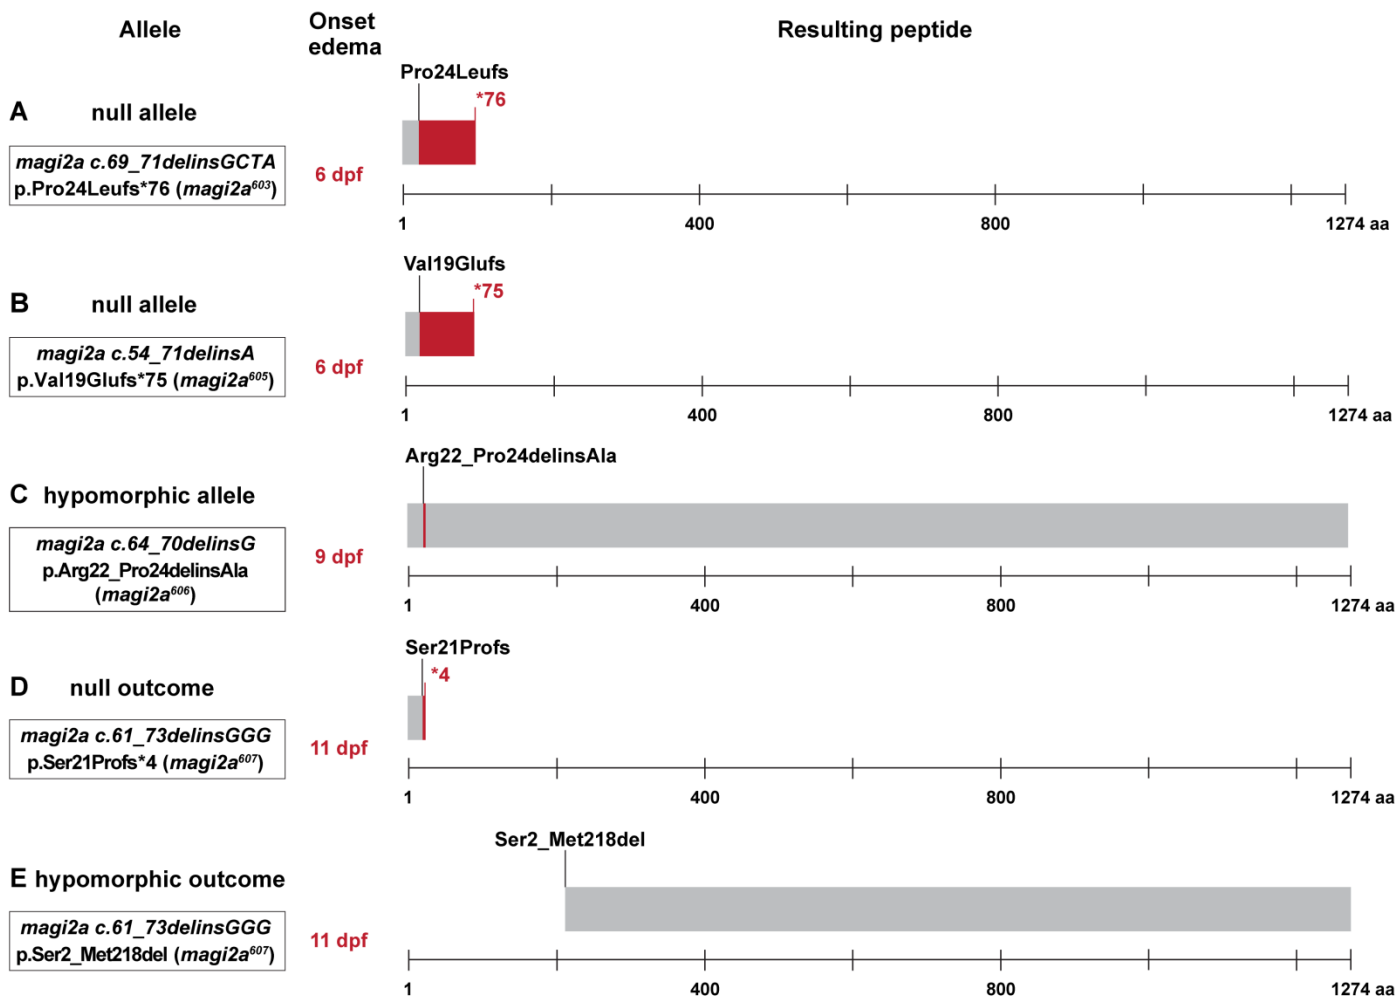

**Supplemental Figure S4. Primary structure of the zebrafish Magi2a proteins (peptides) that result from the specific null vs. hypomorphic alleles introduced by CRISPR/Cas9.**

(A-B) The alleles *c.69\_71delinsGCTA* (*magi2a*<sup>cl604</sup>, **A**) and *c.54\_71delinsA* (*magi2a*<sup>cl605</sup>, **B**) lead both to a frameshift with a new stop codon in exon 2, resulting in early termination of the protein, containing 99 and 93 amino acids, respectively. Note that Kaplan-Meier plots for edema onset and survival (see **Fig. 2**) had shown that *magi2a*<sup>-/-</sup> larvae carrying the hypothetical null alleles *c.69\_71delinsGCTA*, p.Pro24Leufs\*76 (**A**) and *c.54\_71delinsA*, p.Val19Glufs\*75 (**B**) develop an edema phenotype by 6 dpf, accompanied with impaired survival.

(C) In contrast to the truncating alleles (A-B), the inframe allele *c.64\_70delinsG* (*magi2a*<sup>cl606</sup>) results in mostly intact protein with only an early and small deletion/insertion in the PDZ0 domain, and can be therefore considered a hypomorphic allele. For larvae carrying this inframe allele *c.64\_70delinsG*, p.Arg22\_Pro24delinsAla edema onset is delayed 9 dpf and survival is only slightly impaired (see **Fig. 2**).

(D-E) The mutation *c.61\_73delinsGGG* (*magi2a*<sup>cl607</sup>) induces a frameshift with a new stop codon in exon 1, has two potential consequences for the protein structure. Either it may result in another truncated protein, p.Ser21Profs\*4 (**D**), or a new translation initiation site is used as predicted for Met218, leading to a n-terminally truncated protein, p.Ser2\_Met218del (**E**), lacking PDZ0 and GK domains. The second hypothesis is supported by the later onset of edema in *c.61\_73delinsGGG* at 11dpf (see **Fig. 2**), which resembles more the course of the other hypomorphic allele (**C**) rather than the course of the truncating alleles (A-B).
