# Supplementary material
Source: PubMed Central journal article supplement (PMC6481319)
Supplement: NIHMS1521269-supplement-5.pdf [file NIHMS1521269-supplement-5.pdf]

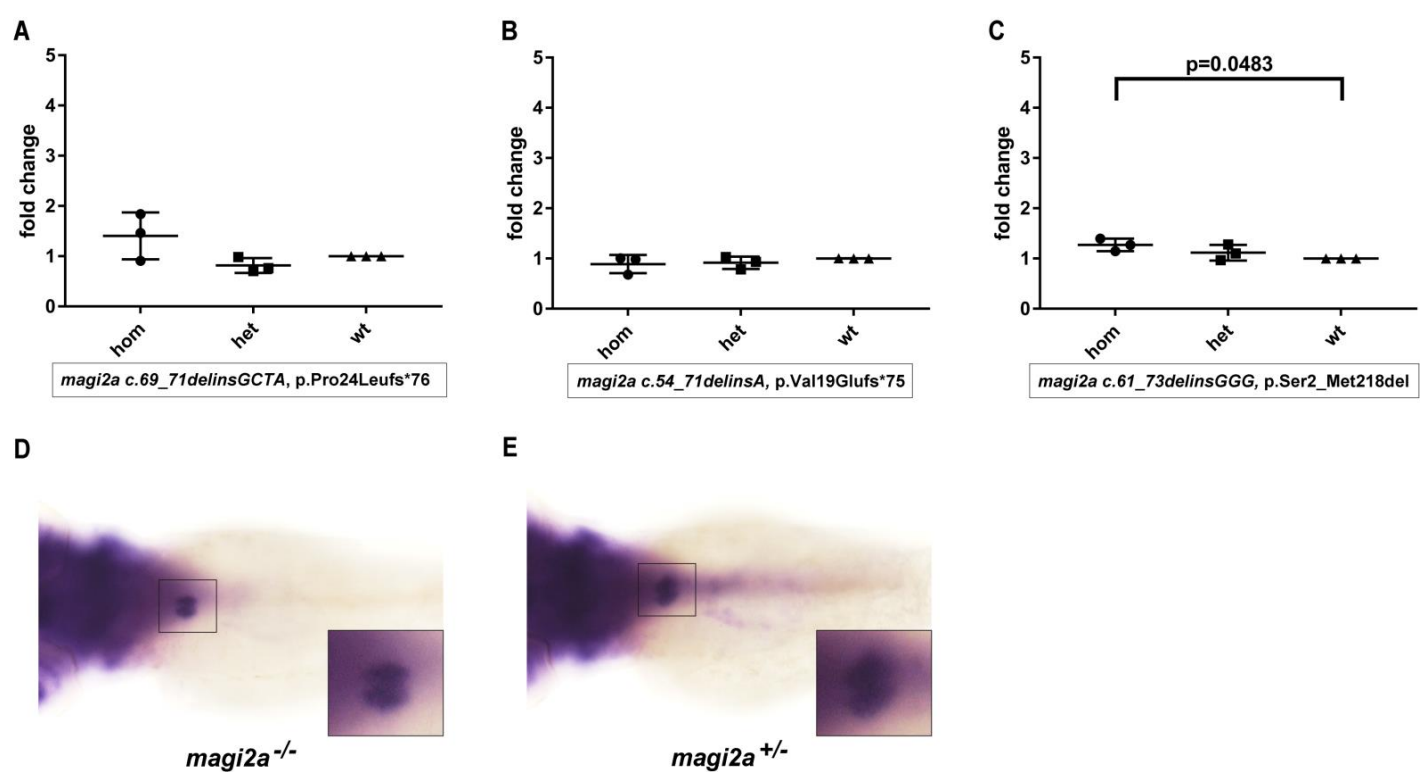

**Supplemental Figure S5. Nonsense mediated decay is not involved in the pathogenesis of *magi2a* KO.**

(A-C) qPCR at 6 dpf for the three *magi2a* alleles that would potentially undergo nonsense-mediated decay, reveals no reduction in expression of the transcript in neither of the KO alleles, suggesting the absence of nonsense mediated decay. (C) In contrast, *magi2a* expression is elevated in homozygous *magi2a c.61\_73delinsGGG* larvae; p=0.0483.

Specific alleles are indicated below panels. Expression from 3 biological replicates for each genotype is displayed as fold change compared to wildtype control.

(D-E) Consistent with the qPCR results, *in situ* hybridisation (ISH) for *magi2a* at 72hpf does not show a significant reduction in *magi2a* expression for homozygous *magi2a* (D; *magi2a<sup>-/-</sup>*) KO larvae (null allele: *c.69\_71delinsGCTA, p.Pro24Leufs\*76*) compared to a heterozygous clutch mate (E; *magi2a<sup>+/-</sup>*).
