# Supplementary material
Source: PubMed Central journal article supplement (PMC6481319)
Supplement: NIHMS1521269-supplement-6.pdf [file NIHMS1521269-supplement-6.pdf]

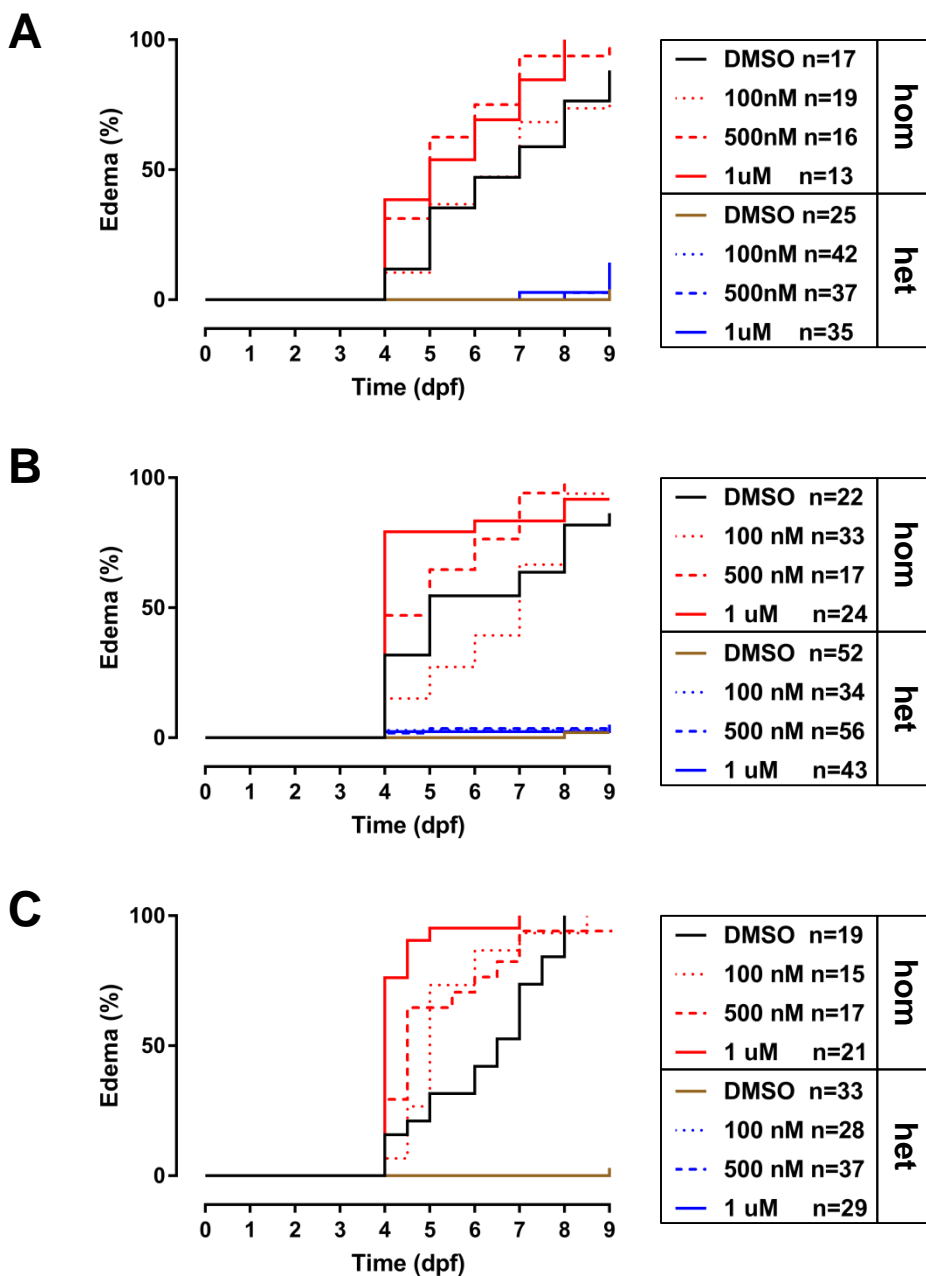

**Supplemental Figure S6. Replicates of Dexamethasone treatment of *magi2a*<sup>-/-</sup> (*c.70\_72delinsGTCC*, p.Pro24Valfs\*76) larvae.**

Kaplan-Meier plots for onset of the edema phenotype for *magi2a*<sup>+/+</sup> and *magi2a*<sup>-/-</sup> larvae. Treatment started at 48 hpf with 0.1% DMSO vehicle control or increasing concentrations of dexamethasone (100 nM, 500 nM or 1  $\mu$ M). Genotypes were confirmed by Sanger sequencing. Numbers of larvae per group are indicated. **A-C** show 3 replicates of the experiment shown in **Fig.4C**

**(A and B)** Higher doses of Dexamethasone (500 nM and 1  $\mu$ M) cause a significantly earlier onset of the edema phenotype in *magi2a*<sup>-/-</sup> KO larvae compared to 100 nM and DMSO vehicle control ( $P = 0.0375$  for **(A)** and  $P = 0.0114$  for **(B)**, calculated by Log-rank (Mantel Cox) test).

**(C)** Increasing doses of Dexamethasone (100 nM, 500 nM and 1  $\mu$ M) cause a significantly earlier onset of the edema phenotype in *magi2a*<sup>-/-</sup> KO larvae compared to DMSO vehicle control ( $P < 0.0001$ ). The curves of control and treatment groups for heterozygotes coincide without any appearance of edema, and therefore overlap in one single line.
