# Supplementary material
Source: PubMed Central journal article supplement (PMC6481319)
Supplement: NIHMS1521269-supplement-7.pdf [file NIHMS1521269-supplement-7.pdf]

**A**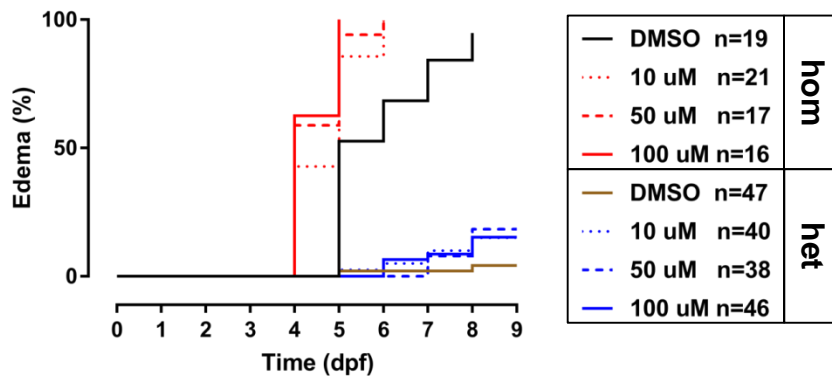**B**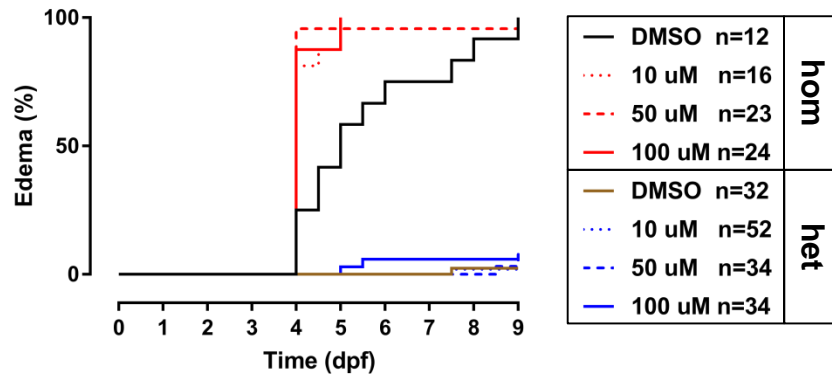

**Supplemental Figure S7. Replicates of Prednisolone treatment of *magi2a*<sup>-/-</sup> (c.69\_71delinsGCTA, p.Pro24Leufs\*76) larvae.**

Kaplan-Meier plots for onset of the edema phenotype for *magi2a*<sup>+/+</sup> and *magi2a*<sup>-/-</sup> larvae. Treatment started at 48 hpf with 0.1% DMSO vehicle control or increasing concentrations of Prednisolone (10  $\mu$ M, 50  $\mu$ M or 100  $\mu$ M). Genotypes were confirmed by Sanger sequencing. Numbers of larvae per group are indicated. **A-B** show 2 replicates of the experiment shown in **Fig.4D**.

**(A and B)** Increasing doses of Prednisolone (10  $\mu$ M, 50  $\mu$ M or 100  $\mu$ M) cause a significantly earlier onset of the edema phenotype in *magi2a*<sup>-/-</sup> KO larvae compared to DMSO vehicle control I (P <0.0001 for **(A)** and P = 0.0161 for **(B)**, calculated by Log-rank (Mantel Cox) test).
