# Supplementary material
Source: PubMed Central journal article supplement (PMC6481319)
Supplement: NIHMS1521269-supplement-8.pdf [file NIHMS1521269-supplement-8.pdf]

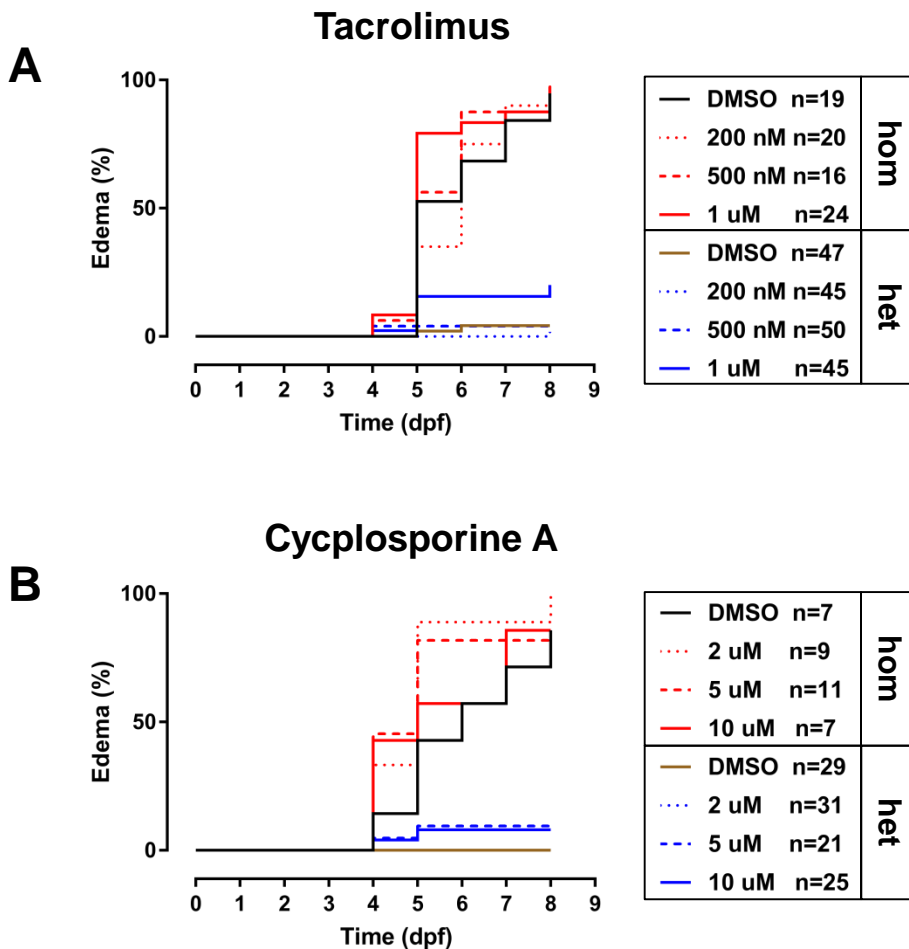

**Supplemental Figure S8. Calcineurin inhibitor treatment of *magi2a*<sup>-/-</sup> (*c.69\_71delinsGCTA*, *p.Pro24Leufs\*76*) larvae does not alter the edema phenotype.**

Kaplan-Meier plots for onset of the edema phenotype for *magi2a*<sup>+/+</sup> and *magi2a*<sup>-/-</sup> larvae. Treatment started at 48 hpf with 0.1% DMSO vehicle control or increasing drug concentrations. Genotypes were confirmed by Sanger sequencing. Numbers of larvae per group are indicated.

**(A)** Replicate of experiment shown in **Fig. 4E** Increasing doses of Tacrolimus (200 nM, 500 nM or 1  $\mu$ M) do not cause a significantly earlier onset of the edema phenotype in *magi2a*<sup>-/-</sup> KO larvae compared to DMSO vehicle control I ( $P = 0.3914$ , calculated by Log-rank [Mantel Cox] test), but cause edema in *magi2a*<sup>+/-</sup> larvae in the highest concentration ( $P = 0.0068$ , calculated by Log-rank [Mantel Cox] test).

**(B)** Increasing doses of Cyclosporine A (2  $\mu$ M, 5  $\mu$ M or 10  $\mu$ M) do not cause a significantly earlier onset of the edema phenotype in *magi2a*<sup>-/-</sup> KO larvae compared to DMSO vehicle control I ( $P = 0.6825$ , calculated by Log-rank [Mantel Cox] test). Note that Cyclosporine induces a severe behavioral/neuronal phenotype (as described in Clift, *Behav Brain Res* 2015; 282:117-124) after 4 days of treatment (6 dpf) with early death that required termination of the experiment at 8 dpf instead of 9 dpf.
