# Supplementary material
Source: PubMed Central journal article supplement (PMC6481319)
Supplement: NIHMS1521269-supplement-9.pdf [file NIHMS1521269-supplement-9.pdf]

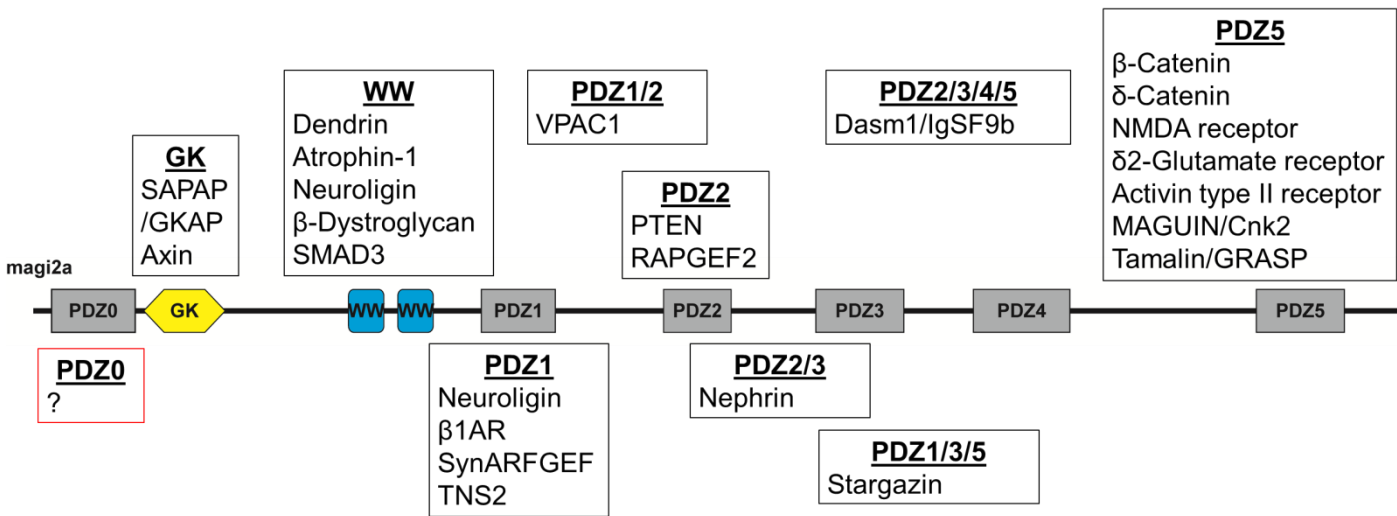

### Supplemental Figure S9. Domain specific binding of known MAGI2 interactors.

(modified from: Nagashima et al., *JB Rev* 2015; 157:177-184)

Predicted domain structure of zebrafish Magi2a featuring six PDZ domains (grey), one Guanylate Kinase-like (GK, yellow) domain and two WW domains (blue). Ligands binding to the domains are indicated in domain specific boxes. Some ligands bind to more than one of the PDZ domains. Note that no known ligand is known for the PDZ0 domain that's is affected in the two hypomorphic lines .
