# Supplementary material
Source: PubMed Central journal article supplement (PMC6481319)
Supplement: NIHMS1521269-supplement-11.pdf [file NIHMS1521269-supplement-11.pdf]

Suppl. Table S1: CRISPR oligo sequences

| Accession number   | Name              | Sequence                                                                                         | CHOPCHOP parameters |                    |                      |                      |
|--------------------|-------------------|--------------------------------------------------------------------------------------------------|---------------------|--------------------|----------------------|----------------------|
|                    |                   |                                                                                                  | Ranking             | off targets        |                      |                      |
|                    |                   |                                                                                                  |                     | 1<br>missm<br>atch | 2<br>missm<br>atches | 3<br>missm<br>atches |
| ENSDART00000133644 | oligo_magi2a_E1_1 | TAATACGACTCACTATA <span style="color: green;">GGTTGTCCAGGGTCCGAG</span> GTTTTAGAGCTAGAAATAGCAAG  | 42                  | 0                  | 0                    | 0                    |
| ENSDART00000110879 | oligo_magi2b_E2_1 | TAATACGACTCACTATA <span style="color: green;">GGTGCCCGACCTAGTGCAG</span> GTTTTAGAGCTAGAAATAGCAAG | 1                   | 0                  | 0                    | 0                    |
