# Supplementary material
Source: PubMed Central journal article supplement (PMC6481319)
Supplement: NIHMS1521269-supplement-12.pdf [file NIHMS1521269-supplement-12.pdf]

Suppl. Table S2: annotation lines

| ZFIN line designator           | gene          | transcript           | NM number    | coding strand | deleted nucleotides (coding strand) | inserted nucleotides (coding strand) | cDNA              | protein                | protein sequence (red: AS different from ref. protein sequence)                                                                                                                                                                                                                                                                                                                                                                                                                                                                                                                                                                                                                                                                                                                                                                                                                                                                                                                                                                                                                                                                                                                                                                                                                                                                                                                    | number of aminoacids |
|--------------------------------|---------------|----------------------|--------------|---------------|-------------------------------------|--------------------------------------|-------------------|------------------------|------------------------------------------------------------------------------------------------------------------------------------------------------------------------------------------------------------------------------------------------------------------------------------------------------------------------------------------------------------------------------------------------------------------------------------------------------------------------------------------------------------------------------------------------------------------------------------------------------------------------------------------------------------------------------------------------------------------------------------------------------------------------------------------------------------------------------------------------------------------------------------------------------------------------------------------------------------------------------------------------------------------------------------------------------------------------------------------------------------------------------------------------------------------------------------------------------------------------------------------------------------------------------------------------------------------------------------------------------------------------------------|----------------------|
| <i>magi2a</i> <sup>cl604</sup> | <i>magi2a</i> | ENSDART00000133644   | NM_001327853 | reverse       | TCC                                 | GCTA                                 | c.69_71delinsGCTA | p.Pro24Leufs*76        | MSKSLKKKSHWTNRVHEVVLRSRGL <b>EWGSRVRAAGRRGERTVPRYWRGETGQ</b><br><b>AQTAAGRAASGGKRYSSGRTDHQGCLGGCQALQRPCSVQVCQTRRCCG*</b>                                                                                                                                                                                                                                                                                                                                                                                                                                                                                                                                                                                                                                                                                                                                                                                                                                                                                                                                                                                                                                                                                                                                                                                                                                                           | 99                   |
| <i>magi2a</i> <sup>cl605</sup> | <i>magi2a</i> | ENSDART00000133644   | NM_001327853 | reverse       | TGTGTTGTCCAGGGGTCC                  | A                                    | c.54_71delinsA    | p.Val19Glufs*75        | MSKSLKKKSHWTNRVHEV <b>EWGSRVRAAGRRGERTVPRYWRGETGQAQTAAG</b><br><b>RAASGGKRYSSGRTDHQGCLGGCQALQRPCSVQVCQTRRCCG*</b>                                                                                                                                                                                                                                                                                                                                                                                                                                                                                                                                                                                                                                                                                                                                                                                                                                                                                                                                                                                                                                                                                                                                                                                                                                                                  | 93                   |
| <i>magi2a</i> <sup>cl606</sup> | <i>magi2a</i> | ENSDART00000133644   | NM_001327853 | reverse       | AGGGGTCC                            | G                                    | c.64_70delinsG    | p.Arg22_Pro24delinsAla | MSKSLKKKSHWTNRVHEVVLRSR <b>AGDGLGFELQGGGAENGQFPVIGEVKPDRRRLQ</b><br>QDELLLEVNDTPVAGLTIRDVWAVVVRHCKDPVRFKCVKQGGVVDKDLRQYLNL<br>RFQKGSVDHELQIIRDNLRLYRTPCTTRQPREGEVPGVDYNFVTVRVERFVELER<br>SGALLESPTYEDNYGGTPKPPAEPSPDLLNVAEQLLPATPTSQGKRRNRKSVS<br>NMEKAGIEPPEEEEEERPVINGNGVAITPESSEHEDEKSTDASGEMATTCSETST<br>DAPKEDTEPPKSPKPDENDELGPLPDNWEAMAYTEKGEVYFIDHNTKTTSWLD<br>PRLAKKAKPPEECKENELPYGWEKIDDPYGTYYVDHINRRTOFENPVLEAKRRL<br>QHQQMQSQGLSSLPAPVYREKPLFTRDPTQLKGSFSLSTPLQKSNMGFGFTII<br>GGDEPDEFQVKSVIPDGPAAQDGKMATGDVIVYINDVVCVLGTTHADVVKLFQS<br>VPIGQSVTLVLCRGYPLPYDPEAANTLLSPLGLIDRPLLNGRNSYDSYMEYISR<br>TARFVDPLQTTMVQPHPGDTHLDAGPLEDSVSMASGGAAGGELLTINMVKGAD<br>FGFTIADSNGGQRVKQILEAQGCPGLCEGLDIVEINQQPALTLSTQVVELLKEC<br>CPIGTEATLVIQRGGTVCSFTLQVTFPLGRPLNRSIHICTGLQVQNLTPWNLMT<br>TCMRSPGLSMRIGVTEFQEVVHLRRQKSGFGFRILGEEEPGQPILIGAIIEKSPA<br>DKDGRLRPGDELISVDGIVVAGKPHRYVIDLMHGAARTGQVKLTVRRRVQPTGE<br>PFENGRSPGSTQHSSPRDFNSRMFCNNSAPSQNSAPSTTGSSPPDTAANQ<br>NAQPNVDSIQRKETEGFGFVISSLNRPETAAAAAVPHKIGRIIEGSPADHCGKLLK<br>VGDRLAVNNQSIWNMPHADIVKLIKDAGLSVTLRIIPQEETNSTPSAGSSEKQSP<br>MAQPSVCPQNTVNTQGAAPLANSAQNSAPQPSPIKQPISEAQPSLVTQNSP<br>PANHPSSVTQQNPQTQPVQTYSHDSSYRSEVKARQDVKPDIRQPFDTYRQPPV<br>DYRHPVADYRQPPTLDYRHPPLLDYRPLPADPRTFPLPDYRMPQDFDFTVEL<br>EKGKMGFGFSIRGGREYKMDLFLVRLAEDGPAIRNRMVRVGDQIIEINGESTRD<br>MTHARAIELIKSGGRRVRLLLKRGTVGPEYGMVSSLSMCMKSDNHGSPYFFL | 1272                 |
| <i>magi2a</i> <sup>cl607</sup> | <i>magi2a</i> | ENSDART00000133644   | NM_001327853 | reverse       | TCCAGGGGTCCGA                       | GGG                                  | c.61_73delinsGGG  | p.Ser2_Met218del       | MEKAGIEPPEEEEEERPVINGNGVAITPESSEHEDEKSTDASGEMATTCSETSTD<br>APKEDTEPPKSPKPDENDELGPLPDNWEAMAYTEKGEVYFIDHNTKTTSWLDP<br>RLAKKAKPPEECKENELPYGWEKIDDPYGTYYVDHINRRTOFENPVLEAKRRLQ<br>HQQQMQSQGLSSLPAPVYREKPLFTRDPTQLKGSFSLSTPLQKSNMGFGFTIIG<br>GDEPDEFQVKSVIPDGPAAQDGKMATGDVIVYINDVVCVLGTTHADVVKLFQSV<br>PIGQSVTLVLCRGYPLPYDPEAANTLLSPLGLIDRPLLNGRNSYDSYMEYISR<br>ARFVDPLQTTMVQPHPGDTHLDAGPLEDSVSMASGGAAGGELLTINMVKGADG<br>FGFTIADSNGGQRVKQILEAQGCPGLCEGLDIVEINQQPALTLSTQVVELLKEC<br>PIGTEATLVIQRGGTVCSFTLQVTFPLGRPLNRSIHICTGLQVQNLTPWNLMT<br>CMRSPGLSMRIGVTEFQEVVHLRRQKSGFGFRILGEEEPGQPILIGAIIEKSPA<br>DKDGRLRPGDELISVDGIVVAGKPHRYVIDLMHGAARTGQVKLTVRRRVQPTGE<br>PFENGRSPGSTQHSSPRDFNSRMFCNNSAPSQNSAPSTTGSSPPDTAANQ<br>AQPNVDSIQRKETEGFGFVISSLNRPETAAAAAVPHKIGRIIEGSPADHCGKLLK<br>VGDRLAVNNQSIWNMPHADIVKLIKDAGLSVTLRIIPQEETNSTPSAGSSEKQSP<br>AQPSVCPQNTVNTQGAAPLANSAQNSAPQPSPIKQPISEAQPSLVTQNSP<br>NHPSSVTQQNPQTQPVQTYSHDSSYRSEVKARQDVKPDIRQPFDTYRQPPV<br>DYRHPVADYRQPPTLDYRHPPLLDYRPLPADPRTFPLPDYRMPQDFDFTVEL<br>EKGKMGFGFSIRGGREYKMDLFLVRLAEDGPAIRNRMVRVGDQIIEINGESTRD<br>MTHARAIELIKSGGRRVRLLLKRGTVGPEYGMVSSLSMCMKSDNHGSPYFFL                                                                                                                                                                                                                                                         |                      |
|                                | <i>magi2a</i> | ENSDART00000133644   | NM_001327853 | reverse       | TCCAGGGGTCCGA                       | GGG                                  | c.61_73delinsGGG  | p.Ser21Profs*4         | MSKSLKKKSHWTNRVHEVVL <b>GVGI*</b>                                                                                                                                                                                                                                                                                                                                                                                                                                                                                                                                                                                                                                                                                                                                                                                                                                                                                                                                                                                                                                                                                                                                                                                                                                                                                                                                                  | 24                   |
| <i>magi2b</i> <sup>cl608</sup> | <i>magi2b</i> | ENSDART00000110879.3 | n/a          | reverse       | GACCTAGTGCA                         | n/a                                  | c.620_630del      | p.Pro208Glyfs*6        | MSKSLKKKSHWTNRVHEALLGRNKEGELGFDLKGGAENGNFPYFGEVKQGGK<br>AIQSGKLSQDELLLEVNDTPVAGLTIRDVLAIVIKHCKDPFRLKCVKQGGVVDDKL<br>RHYLNLRQKGSVDHELQIIRDNLRLYRTPCTTRQPEKEGEVPGVDYNFVSVR<br>FMELEKSGALLESPTYEDNYGGTPKPPAEPPTMPLFNVTDQLLPGAR <b>GEKEEK</b>                                                                                                                                                                                                                                                                                                                                                                                                                                                                                                                                                                                                                                                                                                                                                                                                                                                                                                                                                                                                                                                                                                                                          | 213                  |
| <i>magi2b</i> <sup>cl609</sup> | <i>magi2b</i> | ENSDART00000110879.3 | n/a          | reverse       | GCAGA                               | n/a                                  | c.628_632del      | p.Ala210Glyfs*6        | MSKSLKKKSHWTNRVHEALLGRNKEGELGFDLKGGAENGNFPYFGEVKQGGK<br>AIQSGKLSQDELLLEVNDTPVAGLTIRDVLAIVIKHCKDPFRLKCVKQGGVVDDKL<br>RHYLNLRQKGSVDHELQIIRDNLRLYRTPCTTRQPEKEGEVPGVDYNFVSVR<br>FMELEKSGALLESPTYEDNYGGTPKPPAEPPTMPLFNVTDQLLPGAR <b>PSGEKEEK</b>                                                                                                                                                                                                                                                                                                                                                                                                                                                                                                                                                                                                                                                                                                                                                                                                                                                                                                                                                                                                                                                                                                                                        | 215                  |
